# Supplementary material for: Glyphosate Use and Cancer Incidence in the Agricultural Health Study
Source: Oxford University Press journal article supplement (doi:10.1093/jnci/djx233), 2017-10-10
Supplement: djx233_supptables.pdf [file djx233_supptables.pdf]

**Supplementary Table 1. Cancer incidence in relation to Lifetime Days of Glyphosate Use in the Agricultural Health Study**

| Cancer Site*               | Glyphosate Use† | N cases | RR‡  | 95% CI‡ |      | p-trend‡ |
|----------------------------|-----------------|---------|------|---------|------|----------|
| <b>All Cancers</b>         | None            | 1,511   | 1.00 | -       | -    |          |
|                            | Q1              | 1,423   | 1.01 | 0.93    | 1.09 |          |
|                            | Q2              | 1,424   | 0.98 | 0.90    | 1.06 |          |
|                            | Q3              | 1,409   | 1.02 | 0.94    | 1.11 |          |
|                            | Q4              | 1,537   | 1.00 | 0.92    | 1.08 | 0.98     |
| <b>Oral Cavity</b>         | None            | 33      | 1.00 | -       | -    |          |
|                            | Q1              | 34      | 0.94 | 0.55    | 1.61 |          |
|                            | Q2              | 35      | 0.96 | 0.57    | 1.62 |          |
|                            | Q3              | 37      | 0.97 | 0.57    | 1.65 |          |
|                            | Q4              | 35      | 0.79 | 0.46    | 1.37 | 0.35     |
| <b>Colon</b>               | None            | 116     | 1.00 | -       | -    |          |
|                            | Q1              | 111     | 1.13 | 0.84    | 1.51 |          |
|                            | Q2              | 100     | 0.95 | 0.70    | 1.29 |          |
|                            | Q3              | 91      | 0.96 | 0.70    | 1.31 |          |
|                            | Q4              | 103     | 1.00 | 0.73    | 1.37 | 0.81     |
| <b>Rectum</b>              | None            | 50      | 1.00 | -       | -    |          |
|                            | Q1              | 42      | 0.85 | 0.54    | 1.34 |          |
|                            | Q2              | 49      | 0.98 | 0.64    | 1.52 |          |
|                            | Q3              | 43      | 0.96 | 0.61    | 1.50 |          |
|                            | Q4              | 50      | 0.84 | 0.53    | 1.33 | 0.51     |
| <b>Pancreas</b>            | None            | 25      | 1.00 | -       | -    |          |
|                            | Q1              | 46      | 1.93 | 1.13    | 3.27 |          |
|                            | Q2              | 31      | 1.39 | 0.78    | 2.47 |          |
|                            | Q3              | 27      | 1.18 | 0.64    | 2.16 |          |
|                            | Q4              | 27      | 1.11 | 0.60    | 2.05 | 0.26     |
| <b>Lung</b>                | None            | 144     | 1.00 | -       | -    |          |
|                            | Q1              | 130     | 1.04 | 0.80    | 1.36 |          |
|                            | Q2              | 133     | 1.10 | 0.84    | 1.45 |          |
|                            | Q3              | 143     | 1.22 | 0.93    | 1.60 |          |
|                            | Q4              | 139     | 1.12 | 0.84    | 1.48 | 0.58     |
| <b>Melanoma</b>            | None            | 56      | 1.00 | -       | -    |          |
|                            | Q1              | 54      | 0.94 | 0.62    | 1.42 |          |
|                            | Q2              | 64      | 1.09 | 0.74    | 1.62 |          |
|                            | Q3              | 77      | 1.31 | 0.89    | 1.93 |          |
|                            | Q4              | 78      | 1.13 | 0.76    | 1.69 | 0.52     |
| <b>Prostate</b>            | None            | 579     | 1.00 | -       | -    |          |
|                            | Q1              | 553     | 0.97 | 0.85    | 1.10 |          |
|                            | Q2              | 544     | 0.95 | 0.84    | 1.08 |          |
|                            | Q3              | 576     | 1.06 | 0.93    | 1.20 |          |
|                            | Q4              | 597     | 0.97 | 0.85    | 1.11 | 0.87     |
| <b>Testicular</b>          | None            | 7       | 1.00 | -       | -    |          |
|                            | T1              | 14      | 1.32 | 0.49    | 3.56 |          |
|                            | T2              | 11      | 0.72 | 0.25    | 2.02 |          |
|                            | T3              | 17      | 0.92 | 0.34    | 2.53 | 0.74     |
|                            | <b>Bladder</b>  | None    | 66   | 1.00    | -    | -        |
| Q1                         |                 | 84      | 1.34 | 0.95    | 1.90 |          |
| Q2                         |                 | 81      | 1.20 | 0.84    | 1.71 |          |
| Q3                         |                 | 58      | 0.94 | 0.64    | 1.39 |          |
| Q4                         |                 | 78      | 1.20 | 0.83    | 1.74 | 0.87     |
| <b>Kidney</b>              | None            | 54      | 1.00 | -       | -    |          |
|                            | Q1              | 44      | 0.96 | 0.62    | 1.48 |          |
|                            | Q2              | 58      | 1.06 | 0.69    | 1.62 |          |
|                            | Q3              | 42      | 0.90 | 0.57    | 1.41 |          |
|                            | Q4              | 58      | 1.03 | 0.67    | 1.61 | 0.83     |
| <b>Lymphohematopoietic</b> |                 |         |      |         |      |          |

|                                                                 |             |     |      |      |       |      |
|-----------------------------------------------------------------|-------------|-----|------|------|-------|------|
|                                                                 | <b>None</b> | 161 | 1.00 | -    | -     |      |
|                                                                 | Q1          | 126 | 0.87 | 0.63 | 1.23  |      |
|                                                                 | Q2          | 138 | 0.87 | 0.71 | 1.22  |      |
|                                                                 | Q3          | 129 | 0.92 | 0.69 | 1.22  |      |
|                                                                 | Q4          | 153 | 0.95 | 0.72 | 1.26  | 0.74 |
| <b>Hodgkin Lymphoma</b>                                         |             |     |      |      |       |      |
|                                                                 | <b>None</b> | 7   | 1.00 | -    | -     |      |
|                                                                 | M1          | 6   | 0.39 | 0.13 | 1.23  |      |
|                                                                 | M2          | 12  | 0.66 | 0.23 | 1.93  | 0.80 |
| <b>Non-Hodgkin Lymphoma</b>                                     |             |     |      |      |       |      |
|                                                                 | <b>None</b> | 135 | 1.00 | -    | -     |      |
|                                                                 | Q1          | 103 | 0.76 | 0.57 | 1.01  |      |
|                                                                 | Q2          | 117 | 0.87 | 0.66 | 1.14  |      |
|                                                                 | Q3          | 107 | 0.85 | 0.64 | 1.13  |      |
|                                                                 | Q4          | 116 | 0.80 | 0.60 | 1.06  | 0.44 |
| <b>Non-Hodgkin Lymphoma B-cell</b>                              |             |     |      |      |       |      |
|                                                                 | <b>None</b> | 128 | 1.00 | -    | -     |      |
|                                                                 | Q1          | 95  | 0.73 | 0.54 | 0.98  |      |
|                                                                 | Q2          | 102 | 0.80 | 0.60 | 1.06  |      |
|                                                                 | Q3          | 103 | 0.86 | 0.65 | 1.15  |      |
|                                                                 | Q4          | 107 | 0.78 | 0.58 | 1.05  | 0.54 |
| <b>Chronic Lymphocytic Leukemia, Small Lymphocytic Lymphoma</b> |             |     |      |      |       |      |
|                                                                 | <b>None</b> | 36  | 1.00 | -    | -     |      |
|                                                                 | Q1          | 24  | 0.59 | 0.33 | 1.08  |      |
|                                                                 | Q2          | 26  | 0.74 | 0.42 | 1.29  |      |
|                                                                 | Q3          | 28  | 0.89 | 0.52 | 1.54  |      |
|                                                                 | Q4          | 29  | 0.85 | 0.49 | 1.48  | 0.75 |
| <b>Diffuse Large B-Cell Lymphoma</b>                            |             |     |      |      |       |      |
|                                                                 | <b>None</b> | 27  | 1.00 | -    | -     |      |
|                                                                 | Q1          | 26  | 1.00 | 0.55 | 1.82  |      |
|                                                                 | Q2          | 31  | 1.24 | 0.70 | 2.20  |      |
|                                                                 | Q3          | 21  | 0.94 | 0.50 | 1.75  |      |
|                                                                 | Q4          | 26  | 0.97 | 0.52 | 1.81  | 0.70 |
| <b>Marginal-zone Lymphoma</b>                                   |             |     |      |      |       |      |
|                                                                 | <b>None</b> | 4   | 1.00 | -    | -     |      |
|                                                                 | M1          | 5   | 0.32 | 0.07 | 1.52  |      |
|                                                                 | M2          | 6   | 0.50 | 0.12 | 2.08  | 0.92 |
| <b>Follicular Lymphoma</b>                                      |             |     |      |      |       |      |
|                                                                 | <b>None</b> | 16  | 1.00 | -    | -     |      |
|                                                                 | T1          | 15  | 0.81 | 0.37 | 1.77  |      |
|                                                                 | T2          | 19  | 0.67 | 0.31 | 1.44  |      |
|                                                                 | T3          | 18  | 0.73 | 0.33 | 1.62  | 0.69 |
| <b>Multiple Myeloma</b>                                         |             |     |      |      |       |      |
|                                                                 | <b>None</b> | 30  | 1.00 | -    | -     |      |
|                                                                 | Q1          | 23  | 0.88 | 0.48 | 1.63  |      |
|                                                                 | Q2          | 22  | 0.82 | 0.44 | 1.52  |      |
|                                                                 | Q3          | 22  | 0.94 | 0.50 | 1.74  |      |
|                                                                 | Q4          | 22  | 0.79 | 0.41 | 1.50  | 0.59 |
| <b>Non-Hodgkin Lymphoma T-Cell</b>                              |             |     |      |      |       |      |
|                                                                 | <b>None</b> | 2   | 1.00 | -    | -     |      |
|                                                                 | M1          | 14  | 3.83 | 0.84 | 17.49 |      |
|                                                                 | M2          | 6   | 1.48 | 0.27 | 8.00  | 0.20 |
| <b>Acute Myeloid Leukemia</b>                                   |             |     |      |      |       |      |
|                                                                 | <b>None</b> | 9   | 1.00 | -    | -     |      |
|                                                                 | Q1          | 14  | 1.83 | 0.69 | 4.84  |      |
|                                                                 | Q2          | 11  | 1.05 | 0.31 | 3.53  |      |
|                                                                 | Q3          | 15  | 2.09 | 0.77 | 5.68  |      |
|                                                                 | Q4          | 17  | 2.24 | 0.86 | 5.82  | 0.14 |
| <b>Chronic Myeloid Leukemia</b>                                 |             |     |      |      |       |      |
|                                                                 | <b>None</b> | 7   | 1.00 | -    | -     |      |
|                                                                 | M1          | 7   | 0.61 | 0.18 | 2.10  |      |
|                                                                 | M2          | 9   | 0.70 | 0.19 | 2.50  | 0.89 |

\* Cancer sites are based and presented in order of SEER Site Recode ICD-O-3

† Quartiles: Q1:1-13.74, Q2:13.75-38.74, Q3:38.75-108.4, Q4:≥108.5

Tertiles: T1:1-19.9, T2:20-61.9, T3:≥62.0

Median: M1:1-38.74, M2:≥38.75

‡ Poisson regression was used to model rate ratios and confidence intervals, and p-values were calculated using a two-sided Wald test.

All models adjusted for age, state of recruitment, education, cigarette smoking status, alcohol per month, family history of cancer, and atrazine, alachlor, metolachlor, trifluralin, 2,4-D

Supplementary Table 2. Cancer incidence in relation to Lagged Intensity Weighted Lifetime Days of Glyphosate use in the Agricultural Health

| Cancer Sites*                                                   | Glyphosate Use† | 10-year lag |      |         |          | 15-year lag |      |         |          |      |      |
|-----------------------------------------------------------------|-----------------|-------------|------|---------|----------|-------------|------|---------|----------|------|------|
|                                                                 |                 | N cases     | RR‡  | 95% CI‡ | p-trend‡ | N cases     | RR‡  | 95% CI‡ | p-trend‡ |      |      |
| <b>Lymphohematopoietic</b>                                      |                 |             |      |         |          |             |      |         |          |      |      |
|                                                                 | None            | 235         | 1.00 | -       | -        | 331         | 1.00 | -       | -        |      |      |
|                                                                 | Q1              | 113         | 0.86 | 0.65    | 1.13     | 99          | 0.98 | 0.77    | 1.26     |      |      |
|                                                                 | Q2              | 124         | 1.01 | 0.79    | 1.29     | 83          | 0.88 | 0.68    | 1.14     |      |      |
|                                                                 | Q3              | 113         | 0.98 | 0.75    | 1.27     | 98          | 1.15 | 0.90    | 1.47     |      |      |
|                                                                 | Q4              | 119         | 0.98 | 0.76    | 1.26     | 0.80        | 93   | 1.02    | 0.79     | 1.31 | 0.64 |
| <b>Hodgkin Lymphoma</b>                                         |                 |             |      |         |          |             |      |         |          |      |      |
|                                                                 | None            | 10          | 1.00 | -       | -        | 15          | 1.00 | -       | -        |      |      |
|                                                                 | M1              | 7           | 0.93 | 0.33    | 2.57     | 5           | 0.88 | 0.31    | 2.53     |      |      |
|                                                                 | M2              | 8           | 1.14 | 0.38    | 3.40     | 0.91        | 5    | 0.83    | 0.26     | 2.67 | 0.70 |
| <b>Non-Hodgkin Lymphoma</b>                                     |                 |             |      |         |          |             |      |         |          |      |      |
|                                                                 | None            | 197         | 1.00 | -       | -        | 280         | 1.00 | -       | -        |      |      |
|                                                                 | Q1              | 93          | 0.82 | 0.61    | 1.11     | 80          | 0.91 | 0.69    | 1.19     |      |      |
|                                                                 | Q2              | 104         | 0.98 | 0.76    | 1.27     | 66          | 0.81 | 0.60    | 1.08     |      |      |
|                                                                 | Q3              | 93          | 0.95 | 0.72    | 1.27     | 75          | 1.01 | 0.77    | 1.33     |      |      |
|                                                                 | Q4              | 88          | 0.83 | 0.62    | 1.10     | 0.37        | 74   | 0.94    | 0.71     | 1.24 | 0.97 |
| <b>Non-Hodgkin Lymphoma B-cell</b>                              |                 |             |      |         |          |             |      |         |          |      |      |
|                                                                 | None            | 181         | 1.00 | -       | -        | 256         | 1.00 | -       | -        |      |      |
|                                                                 | Q1              | 85          | 0.81 | 0.59    | 1.12     | 74          | 0.92 | 0.69    | 1.22     |      |      |
|                                                                 | Q2              | 97          | 0.98 | 0.75    | 1.29     | 61          | 0.80 | 0.59    | 1.08     |      |      |
|                                                                 | Q3              | 85          | 0.96 | 0.71    | 1.29     | 71          | 1.03 | 0.78    | 1.38     |      |      |
|                                                                 | Q4              | 84          | 0.87 | 0.64    | 1.16     | 0.61        | 70   | 0.98    | 0.74     | 1.30 | 0.79 |
| <b>Chronic Lymphocytic Leukemia, Small Lymphocytic Lymphoma</b> |                 |             |      |         |          |             |      |         |          |      |      |
|                                                                 | None            | 54          | 1.00 | -       | -        | 68          | 1.00 | -       | -        |      |      |
|                                                                 | Q1              | 16          | 0.56 | 0.29    | 1.05     | 19          | 0.92 | 0.53    | 1.60     |      |      |
|                                                                 | Q2              | 30          | 1.01 | 0.61    | 1.66     | 20          | 0.92 | 0.52    | 1.62     |      |      |
|                                                                 | Q3              | 23          | 0.88 | 0.50    | 1.54     | 21          | 1.28 | 0.76    | 2.18     |      |      |
|                                                                 | Q4              | 20          | 0.81 | 0.46    | 1.43     | 0.84        | 15   | 0.88    | 0.49     | 1.60 | 0.85 |
| <b>Diffuse Large B-Cell Lymphoma</b>                            |                 |             |      |         |          |             |      |         |          |      |      |
|                                                                 | None            | 44          | 1.00 | -       | -        | 64          | 1.00 | -       | -        |      |      |
|                                                                 | Q1              | 22          | 0.91 | 0.52    | 1.61     | 20          | 1.05 | 0.61    | 1.80     |      |      |
|                                                                 | Q2              | 21          | 0.88 | 0.50    | 1.56     | 10          | 0.61 | 0.30    | 1.20     |      |      |
|                                                                 | Q3              | 19          | 0.88 | 0.48    | 1.59     | 16          | 0.90 | 0.49    | 1.65     |      |      |
|                                                                 | Q4              | 24          | 1.06 | 0.61    | 1.85     | 0.49        | 20   | 1.15    | 0.67     | 1.97 | 0.45 |
| <b>Marginal-zone Lymphoma</b>                                   |                 |             |      |         |          |             |      |         |          |      |      |
|                                                                 | None            | 6           | 1.00 | -       | -        | 7           | 1.00 | -       | -        |      |      |
|                                                                 | M1              | 5           | 0.34 | 0.08    | 1.41     | 4           | 0.69 | 0.17    | 2.85     |      |      |
|                                                                 | M2              | 4           | 0.43 | 0.11    | 1.68     | 0.57        | 4    | 0.95    | 0.25     | 3.62 | 0.87 |
| <b>Follicular Lymphoma</b>                                      |                 |             |      |         |          |             |      |         |          |      |      |
|                                                                 | None            | 19          | 1.00 | -       | -        | 33          | 1.00 | -       | -        |      |      |
|                                                                 | T1              | 23          | 1.90 | 0.97    | 3.74     | 13          | 0.98 | 0.49    | 1.99     |      |      |
|                                                                 | T2              | 8           | 0.65 | 0.26    | 1.63     | 9           | 0.65 | 0.28    | 1.52     |      |      |
|                                                                 | T3              | 18          | 1.44 | 0.68    | 3.05     | 0.71        | 13   | 1.08    | 0.53     | 2.20 | 0.78 |
| <b>Multiple Myeloma</b>                                         |                 |             |      |         |          |             |      |         |          |      |      |
|                                                                 | None            | 42          | 1.00 | -       | -        | 59          | 1.00 | -       | -        |      |      |
|                                                                 | Q1              | 16          | 0.60 | 0.29    | 1.21     | 13          | 0.68 | 0.35    | 1.34     |      |      |
|                                                                 | Q2              | 28          | 1.27 | 0.75    | 2.14     | 19          | 1.18 | 0.68    | 2.06     |      |      |
|                                                                 | Q3              | 17          | 0.85 | 0.45    | 1.59     | 14          | 0.97 | 0.53    | 1.79     |      |      |
|                                                                 | Q4              | 15          | 0.64 | 0.33    | 1.24     | 0.17        | 13   | 0.78    | 0.41     | 1.48 | 0.51 |
| <b>Non-Hodgkin Lymphoma T-Cell</b>                              |                 |             |      |         |          |             |      |         |          |      |      |
|                                                                 | None            | 8           | 1.00 | -       | -        | 10          | 1.00 | -       | -        |      |      |
|                                                                 | M1              | 7           | 0.83 | 0.29    | 2.36     | 7           | 1.27 | 0.47    | 3.44     |      |      |
|                                                                 | M2              | 7           | 0.86 | 0.29    | 2.57     | 0.89        | 5    | 0.98    | 0.32     | 3.04 | 0.85 |
| <b>Acute Myeloid Leukemia</b>                                   |                 |             |      |         |          |             |      |         |          |      |      |
|                                                                 | None            | 15          | 1.00 | -       | -        | 22          | 1.00 | -       | -        |      |      |
|                                                                 | Q1              | 11          | 1.12 | 0.48    | 2.59     | 9           | 1.28 | 0.57    | 2.87     |      |      |
|                                                                 | Q2              | 12          | 1.33 | 0.59    | 2.96     | 10          | 1.38 | 0.62    | 3.07     |      |      |
|                                                                 | Q3              | 10          | 1.03 | 0.42    | 2.51     | 12          | 1.81 | 0.85    | 3.86     |      |      |
|                                                                 | Q4              | 18          | 2.09 | 1.00    | 4.38     | 0.04        | 13   | 1.93    | 0.92     | 4.02 | 0.10 |
| <b>Chronic Myeloid Leukemia</b>                                 |                 |             |      |         |          |             |      |         |          |      |      |
|                                                                 | None            | 8           | 1.00 | -       | -        | 11          | 1.00 | -       | -        |      |      |
|                                                                 | M1              | 6           | 0.82 | 0.24    | 2.76     | 5           | 0.93 | 0.27    | 3.18     |      |      |
|                                                                 | M2              | 9           | 1.26 | 0.39    | 4.10     | 0.53        | 7    | 1.55    | 0.50     | 4.82 | 0.39 |

\* Cancer sites are based and presented in order of SEER Site Recode ICD-O-3

† 10-year lag Quartiles: Q1:1-425.24, Q2:425.5-1,297.9, Q3:1,298.0-3,563.9, Q4:≥3,564.0

10-year lag Tertiles: T1:1-658.74, T2:658.75-2,456.9, T3:≥2,457.0

10-year lag Median: M1:1-1297.9, M2:≥1298.0

15-year lag Quartiles: Q1:1-373.2, Q2:373.3-1,119.9, Q3:1,120-3,083.9, Q4:≥3,084.0

15-year lag Tertiles: T1:1-551.24, T2:551.25-2,159.9, T3:≥2,160.0

15-year lag Median: M1:1-1,119.9; M2:≥1,120.0

‡ Poisson regression was used to model rate ratios and confidence intervals, and p-values were calculated using a two-sided Wald test.

All models adjusted for age, state of recruitment, education, cigarette smoking status, alcohol per month, family history of cancer, and atrazine, alachlor, metolachlor, trifluralin, 2,4-D

Supplementary Table 3. Cancer incidence in relation to Lagged Lifetime Days of Glyphosate use in the Agricultural Health Study

| Cancer Site*                                                    | Glyphosate Use† | 5-year lag |      |         |          | 10-year lag |      |         |          | 15-year lag |      |         |          | 20-year lag |      |         |          |      |      |      |      |
|-----------------------------------------------------------------|-----------------|------------|------|---------|----------|-------------|------|---------|----------|-------------|------|---------|----------|-------------|------|---------|----------|------|------|------|------|
|                                                                 |                 | N cases    | RR‡  | 95% CI‡ | p-trend‡ | N cases     | RR‡  | 95% CI‡ | p-trend‡ | N cases     | RR‡  | 95% CI‡ | p-trend‡ | N cases     | RR‡  | 95% CI‡ | p-trend‡ |      |      |      |      |
| <b>Lymphohematopoietic</b>                                      |                 |            |      |         |          |             |      |         |          |             |      |         |          |             |      |         |          |      |      |      |      |
|                                                                 | None            | 179        | 1.00 | -       | -        | 234         | 1.00 | -       | -        | 330         | 1.00 | -       | -        | 434         | 1.00 | -       | -        |      |      |      |      |
|                                                                 | Q1              | 125        | 0.88 | 0.69    | 1.13     | 114         | 0.89 | 0.70    | 1.14     | 101         | 0.94 | 0.74    | 1.20     | 80          | 1.41 | 1.10    | 1.83     |      |      |      |      |
|                                                                 | Q2              | 135        | 0.94 | 0.73    | 1.20     | 115         | 1.02 | 0.80    | 1.30     | 77          | 1.12 | 0.85    | 1.46     | 60          | 0.97 | 0.73    | 1.31     |      |      |      |      |
|                                                                 | Q3              | 129        | 0.96 | 0.74    | 1.23     | 121         | 1.01 | 0.80    | 1.29     | 102         | 1.03 | 0.81    | 1.30     | 60          | 1.01 | 0.76    | 1.34     |      |      |      |      |
|                                                                 | Q4              | 139        | 1.00 | 0.78    | 1.29     | 0.57        | 123  | 1.00    | 0.78     | 1.27        | 0.80 | 97      | 1.03     | 0.81        | 1.32 | 0.75    | 73       | 1.21 | 0.93 | 1.57 | 0.30 |
| <b>Hodgkin Lymphoma</b>                                         |                 |            |      |         |          |             |      |         |          |             |      |         |          |             |      |         |          |      |      |      |      |
|                                                                 | None            | 9          | 1.00 | -       | -        | 10          | 1.00 | -       | -        | 15          | 1.00 | -       | -        | 17          | 1.00 | -       | -        |      |      |      |      |
|                                                                 | M1              | 6          | 0.43 | 0.15    | 1.25     | 6           | 0.79 | 0.28    | 2.24     | 5           | 0.97 | 0.34    | 2.78     | 4           | 1.57 | 0.50    | 4.87     |      |      |      |      |
|                                                                 | M2              | 10         | 0.65 | 0.23    | 1.79     | 0.95        | 9    | 1.05    | 0.38     | 2.86        | 0.77 | 5       | 0.68     | 0.21        | 2.16 | 0.48    | 4        | 1.11 | 0.31 | 4.01 | 0.92 |
| <b>Non-Hodgkin Lymphoma</b>                                     |                 |            |      |         |          |             |      |         |          |             |      |         |          |             |      |         |          |      |      |      |      |
|                                                                 | None            | 149        | 1.00 | -       | -        | 196         | 1.00 | -       | -        | 279         | 1.00 | -       | -        | 354         | 1.00 | -       | -        |      |      |      |      |
|                                                                 | Q1              | 105        | 0.87 | 0.66    | 1.15     | 93          | 0.85 | 0.65    | 1.12     | 83          | 0.89 | 0.68    | 1.16     | 71          | 1.52 | 1.16    | 2.00     |      |      |      |      |
|                                                                 | Q2              | 113        | 0.93 | 0.71    | 1.22     | 97          | 1.00 | 0.77    | 1.31     | 59          | 0.99 | 0.73    | 1.33     | 49          | 0.95 | 0.68    | 1.32     |      |      |      |      |
|                                                                 | Q3              | 105        | 0.92 | 0.69    | 1.21     | 100         | 0.97 | 0.75    | 1.26     | 82          | 0.94 | 0.72    | 1.22     | 48          | 0.97 | 0.71    | 1.33     |      |      |      |      |
|                                                                 | Q4              | 106        | 0.88 | 0.66    | 1.17     | 0.58        | 92   | 0.85    | 0.65     | 1.12        | 0.37 | 75      | 0.91     | 0.69        | 1.20 | 0.62    | 56       | 1.13 | 0.85 | 1.52 | 0.69 |
| <b>Non-Hodgkin Lymphoma B-cell</b>                              |                 |            |      |         |          |             |      |         |          |             |      |         |          |             |      |         |          |      |      |      |      |
|                                                                 | None            | 140        | 1.00 | -       | -        | 180         | 1.00 | -       | -        | 255         | 1.00 | -       | -        | 326         | 1.00 | -       | -        |      |      |      |      |
|                                                                 | Q1              | 95         | 0.84 | 0.63    | 1.12     | 86          | 0.86 | 0.65    | 1.14     | 78          | 0.92 | 0.70    | 1.21     | 66          | 1.52 | 1.14    | 2.02     |      |      |      |      |
|                                                                 | Q2              | 102        | 0.90 | 0.68    | 1.19     | 91          | 1.03 | 0.79    | 1.36     | 55          | 1.00 | 0.73    | 1.36     | 44          | 0.95 | 0.68    | 1.34     |      |      |      |      |
|                                                                 | Q3              | 98         | 0.92 | 0.69    | 1.23     | 90          | 0.95 | 0.72    | 1.25     | 76          | 0.94 | 0.72    | 1.24     | 45          | 0.98 | 0.70    | 1.36     |      |      |      |      |
|                                                                 | Q4              | 100        | 0.89 | 0.66    | 1.19     | 0.80        | 88   | 0.90    | 0.68     | 1.19        | 0.57 | 71      | 0.95     | 0.72        | 1.27 | 0.82    | 54       | 1.18 | 0.87 | 1.60 | 0.51 |
| <b>Chronic Lymphocytic Leukemia, Small Lymphocytic Lymphoma</b> |                 |            |      |         |          |             |      |         |          |             |      |         |          |             |      |         |          |      |      |      |      |
|                                                                 | None            | 41         | 1.00 | -       | -        | 53          | 1.00 | -       | -        | 67          | 1.00 | -       | -        | 87          | 1.00 | -       | -        |      |      |      |      |
|                                                                 | Q1              | 22         | 0.70 | 0.39    | 1.25     | 19          | 0.65 | 0.37    | 1.17     | 19          | 0.79 | 0.44    | 1.41     | 14          | 1.20 | 0.65    | 2.22     |      |      |      |      |
|                                                                 | Q2              | 27         | 0.90 | 0.53    | 1.55     | 23          | 0.92 | 0.54    | 1.57     | 18          | 1.27 | 0.72    | 2.24     | 12          | 1.05 | 0.55    | 1.99     |      |      |      |      |
|                                                                 | Q3              | 26         | 0.94 | 0.54    | 1.62     | 25          | 0.92 | 0.54    | 1.56     | 21          | 1.11 | 0.66    | 1.86     | 16          | 1.47 | 0.84    | 2.55     |      |      |      |      |
|                                                                 | Q4              | 27         | 0.96 | 0.55    | 1.68     | 0.69        | 23   | 0.90    | 0.53     | 1.54        | 0.94 | 18      | 1.02     | 0.58        | 1.77 | 0.86    | 14       | 1.23 | 0.68 | 2.22 | 0.45 |
| <b>Diffuse Large B-Cell Lymphoma</b>                            |                 |            |      |         |          |             |      |         |          |             |      |         |          |             |      |         |          |      |      |      |      |
|                                                                 | None            | 31         | 1.00 | -       | -        | 44          | 1.00 | -       | -        | 64          | 1.00 | -       | -        | 80          | 1.00 | -       | -        |      |      |      |      |

|                                    |    |      |      |      |      |    |      |      |      |      |    |      |      |      |      |    |      |      |      |      |
|------------------------------------|----|------|------|------|------|----|------|------|------|------|----|------|------|------|------|----|------|------|------|------|
| Q1                                 | 27 | 1.11 | 0.63 | 1.96 |      | 21 | 0.88 | 0.50 | 1.53 |      | 19 | 0.97 | 0.57 | 1.66 |      | 14 | 1.34 | 0.74 | 2.44 |      |
| Q2                                 | 30 | 1.25 | 0.72 | 2.17 |      | 25 | 1.17 | 0.69 | 1.99 |      | 14 | 0.97 | 0.52 | 1.83 |      | 12 | 0.98 | 0.50 | 1.92 |      |
| Q3                                 | 17 | 0.79 | 0.42 | 1.50 |      | 17 | 0.76 | 0.42 | 1.39 |      | 14 | 0.77 | 0.42 | 1.40 |      | 11 | 0.96 | 0.49 | 1.87 |      |
| Q4                                 | 26 | 1.10 | 0.60 | 1.99 | 0.97 | 24 | 1.06 | 0.61 | 1.83 | 0.84 | 20 | 1.10 | 0.64 | 1.90 | 0.73 | 14 | 1.28 | 0.71 | 2.31 | 0.91 |
| <b>Marginal-zone Lymphoma</b>      |    |      |      |      |      |    |      |      |      |      |    |      |      |      |      |    |      |      |      |      |
| None                               | 4  | 1.00 | -    | -    |      | 6  | 1.00 | -    | -    |      | 7  | 1.00 | -    | -    |      | 10 | 1.00 | -    | -    |      |
| M1                                 | 6  | 0.51 | 0.12 | 2.12 |      | 5  | 0.40 | 0.10 | 1.65 |      | 4  | 0.84 | 0.20 | 3.49 |      | 2  | 0.84 | 0.17 | 4.09 |      |
| M2                                 | 5  | 0.53 | 0.12 | 2.23 | 0.67 | 4  | 0.42 | 0.11 | 1.63 | 0.42 | 4  | 0.85 | 0.22 | 3.25 | 0.86 | 3  | 1.06 | 0.26 | 4.23 | 0.91 |
| <b>Follicular Lymphoma</b>         |    |      |      |      |      |    |      |      |      |      |    |      |      |      |      |    |      |      |      |      |
| None                               | 16 | 1.00 | -    | -    |      | 19 | 1.00 | -    | -    |      | 33 | 1.00 | -    | -    |      | 41 | 1.00 | -    | -    |      |
| T1                                 | 15 | 0.92 | 0.42 | 2.01 |      | 17 | 1.53 | 0.75 | 3.13 |      | 9  | 0.76 | 0.34 | 1.67 |      | 12 | 1.52 | 0.73 | 3.20 |      |
| T2                                 | 20 | 1.00 | 0.47 | 2.13 |      | 14 | 1.19 | 0.55 | 2.61 |      | 13 | 1.07 | 0.52 | 2.19 |      | 7  | 0.92 | 0.38 | 2.21 |      |
| T3                                 | 17 | 0.94 | 0.42 | 2.07 | 0.92 | 18 | 1.31 | 0.62 | 2.77 | 0.79 | 13 | 0.90 | 0.44 | 1.87 | 0.89 | 8  | 0.96 | 0.42 | 2.21 | 0.79 |
| <b>Multiple Myeloma</b>            |    |      |      |      |      |    |      |      |      |      |    |      |      |      |      |    |      |      |      |      |
| None                               | 33 | 1.00 | -    | -    |      | 42 | 1.00 | -    | -    |      | 59 | 1.00 | -    | -    |      | 73 | 1.00 | -    | -    |      |
| Q1                                 | 21 | 0.80 | 0.43 | 1.48 |      | 19 | 0.83 | 0.46 | 1.50 |      | 18 | 0.92 | 0.52 | 1.63 |      | 17 | 1.80 | 1.03 | 3.15 |      |
| Q2                                 | 22 | 0.84 | 0.46 | 1.54 |      | 23 | 1.11 | 0.63 | 1.94 |      | 12 | 1.03 | 0.54 | 1.95 |      | 9  | 0.85 | 0.40 | 1.78 |      |
| Q3                                 | 24 | 1.06 | 0.59 | 1.90 |      | 19 | 0.94 | 0.52 | 1.68 |      | 17 | 0.93 | 0.52 | 1.66 |      | 11 | 1.13 | 0.59 | 2.18 |      |
| Q4                                 | 19 | 0.75 | 0.39 | 1.44 | 0.55 | 16 | 0.69 | 0.36 | 1.31 | 0.25 | 13 | 0.78 | 0.41 | 1.47 | 0.43 | 9  | 0.86 | 0.42 | 1.75 | 0.52 |
| <b>Non-Hodgkin Lymphoma T-Cell</b> |    |      |      |      |      |    |      |      |      |      |    |      |      |      |      |    |      |      |      |      |
| None                               | 4  | 1.00 | -    | -    |      | 8  | 1.00 | -    | -    |      | 10 | 1.00 | -    | -    |      | 12 | 1.00 | -    | -    |      |
| M1                                 | 12 | 1.91 | 0.59 | 6.18 |      | 6  | 0.76 | 0.26 | 2.27 |      | 5  | 1.04 | 0.35 | 3.13 |      | 7  | 2.49 | 0.95 | 6.57 |      |
| M2                                 | 6  | 0.91 | 0.23 | 3.51 | 0.28 | 8  | 0.92 | 0.32 | 2.66 | 0.94 | 7  | 1.22 | 0.44 | 3.43 | 0.69 | 3  | 0.96 | 0.26 | 3.55 | 0.75 |
| <b>Acute Myeloid Leukemia</b>      |    |      |      |      |      |    |      |      |      |      |    |      |      |      |      |    |      |      |      |      |
| None                               | 10 | 1.00 | -    | -    |      | 15 | 1.00 | -    | -    |      | 22 | 1.00 | -    | -    |      | 34 | 1.00 | -    | -    |      |
| Q1/T1                              | 13 | 1.61 | 0.69 | 3.72 |      | 12 | 1.24 | 0.56 | 2.73 |      | 8  | 0.93 | 0.39 | 2.21 |      | 9  | 1.45 | 0.68 | 3.07 |      |
| Q2/T2                              | 11 | 0.99 | 0.38 | 2.57 |      | 9  | 0.90 | 0.36 | 2.23 |      | 11 | 2.06 | 0.95 | 4.45 |      | 7  | 0.91 | 0.38 | 2.21 |      |
| Q3/T3                              | 16 | 2.11 | 0.92 | 4.85 |      | 13 | 1.58 | 0.73 | 3.42 |      | 11 | 1.58 | 0.74 | 3.35 |      | 16 | 2.30 | 1.22 | 4.33 | -    |
| Q4                                 | 16 | 2.13 | 0.91 | 4.97 | 0.10 | 17 | 2.05 | 0.97 | 4.32 | 0.04 | 14 | 2.18 | 1.06 | 4.46 | 0.05 | -  | -    | -    | -    |      |
| <b>Chronic Myeloid Leukemia</b>    |    |      |      |      |      |    |      |      |      |      |    |      |      |      |      |    |      |      |      |      |
| None                               | 8  | 1.00 | -    | -    |      | 8  | 1.00 | -    | -    |      | 11 | 1.00 | -    | -    |      | 16 | 1.00 | -    | -    |      |
| M1                                 | 6  | 0.50 | 0.15 | 1.72 |      | 8  | 1.15 | 0.37 | 3.54 |      | 5  | 1.01 | 0.30 | 3.46 |      | 4  | 0.89 | 0.25 | 3.20 |      |
| M2                                 | 9  | 0.73 | 0.22 | 2.45 | 0.92 | 7  | 0.82 | 0.23 | 2.92 | 0.63 | 7  | 1.40 | 0.45 | 4.32 | 0.53 | 3  | 0.56 | 0.12 | 2.59 | 0.43 |

\* Cancer sites are based and presented in order of SEER Site Recode ICD-O-3

† 5-year lag Quartiles: Q1:1-11.9, Q2:12.0-35.9, Q3:36.0-105.9, Q4:≥106.0

5-year lag Tertiles: T1:1-19.9, T2:20.0-58.74, T3:≥58.75

5-year lag Median: M1:1-35.9, M2:≥36.0

10-year lag Quartiles: Q1:1-8.9, Q2:9.0-27.9, Q3:28.0-86.9, Q4:≥87.0

10-year lag Tertiles: T1:1-16.74, T2:16.75-55.9, T3:≥56.0

10-year lag Median: M1:1-27.9, M2:≥28.0

15-year lag Quartiles: Q1:1-8.9, Q2:9.0-24.4, Q3:24.5-73.4, Q4:≥73.5

15-year lag Tertiles: T1:1-13.9, T2:14.0-50.74, T3:≥50.75

15-year lag Median: M1:1-24.4, M2:≥24.5

20-year lag Quartiles: Q1:1-8.74, Q2:8.75-21.24, Q3:21.25-59.4, Q4:≥59.5

20-year lag Tertiles: T1:1-9.9, T2:10.0-41.9, T3:≥42.0

20-year lag Median: M1:1-21.24, M2:≥21.25

‡ Poisson regression was used to model rate ratios and confidence intervals, and p-values were calculated using a two-sided Wald test.

All models are adjusted for age, state of recruitment, education, cigarette smoking status, alcohol per month, family history of cancer, and atrazine, alachlor, metolachlor, trifluralin, 2,4-D
